# Supplementary material for: Influence of Commonly Used Primer Systems on Automated Ribosomal Intergenic Spacer Analysis of Bacterial Communities in Environmental Samples
Source: PLoS One. 2015 Mar 6;10(3):e0118967. doi: 10.1371/journal.pone.0118967 (PMC4351999; doi:10.1371/journal.pone.0118967)
Supplement: S1 Table — (XLSX) [file pone.0118967.s001.xlsx]

## Sheet: Sheet1
Table S1. Number of species with positive virtual amplification for different prokaryotic phyla in the embl-pro database (41 phyla, 1200281 sequences) revealed by ecoPCR.
The overlaid heatmap (white = 0, darkest = maximum number of sequences) illustrates rising anticipated amplification success with increasing mismatches and was applied per row (i.e. heatmap is proportional to the sequence number available per phylum). The in-cell bar illustrates the relative contribution of the phyla in the used database.
	No. of species	1406f/23Sr				ITSF/ITSReub				S-D-Bact-1522-b-S-20/L-D-Bact-132-a-A-18
		0 mismatch	1 mismatches	2 mismatches	3 mismatches	0 mismatch	1 mismatches	2 mismatches	3 mismatches	0 mismatch	1 mismatches	2 mismatches	3 mismatches
Bacterial phyla:
Acidobacteria	452	7	8	8	8	6	7	7	7	0	0	7	7
Actinobacteria	42746	165	202	207	216	219	259	264	265	7	169	210	223
Aquificae	244	11	13	13	13	7	11	11	11	0	6	13	13
Armatimonadetes	4	1	1	1	1	0	1	1	1	0	1	1	1
Bacteroidetes	10499	46	80	85	86	18	26	27	28	0	0	21	57
Caldiserica	1	1	1	1	1	0	0	1	1	0	0	1	1
Calescamantes	1	0	0	0	0	0	0	0	0	0	0	0	0
Chlamydiae	121	14	16	17	17	6	6	6	6	0	0	13	16
Chlorobi	176	9	9	10	10	10	10	10	10	0	0	1	9
Chloroflexi	158	10	11	11	13	0	1	3	3	0	1	10	11
Chrysiogenetes	4	1	1	1	1	1	1	1	1	0	0	0	1
Cloacimonetes	1	0	1	1	1	0	0	1	1	0	0	1	1
Cyanobacteria	5852	268	270	273	273	0	57	282	309	0	4	18	69
Deferribacteres	31	1	4	4	4	0	1	1	1	0	0	3	4
Deinococcus-Thermus	540	6	6	6	7	0	1	6	8	0	1	6	6
Dictyoglomi	8	2	2	2	2	0	2	2	2	0	0	2	2
Elusimicrobia	3	0	0	1	1	0	0	1	1	0	0	0	0
Fibrobacteres	4	1	1	1	1	0	0	0	0	0	0	1	1
Firmicutes	39314	266	286	299	302	214	345	375	378	1	77	190	303
Fusobacteria	178	0	1	3	6	0	0	1	1	0	0	0	2
Gemmatimonadetes	29	1	1	1	1	0	0	0	0	0	1	1	1
Gracilibacteria	7	0	0	0	0	0	0	0	0	0	0	0	0
Ignavibacteriae	2	1	2	2	2	1	1	2	2	0	0	1	2
Lentisphaerae	11	0	0	0	0	0	0	0	0	0	0	0	0
Marinimicrobia	15	0	0	0	0	0	0	0	0	0	0	0	0
Nitrospinae	23	0	0	0	0	0	0	0	0	0	0	0	0
Nitrospirae	61	4	5	5	5	1	3	4	4	0	1	3	5
None*	24184	35	51	55	57	32	35	45	46	0	23	27	31
Omnitrophica	1	0	0	0	0	0	0	0	0	0	0	0	0
Planctomycetes	411	0	6	7	13	0	1	6	7	0	0	3	6
Proteobacteria	109836	624	691	703	711	476	730	763	766	1	85	496	634
Spirochaetes	1349	1	17	17	19	2	3	11	11	0	7	17	18
Synergistetes	84	2	6	6	7	0	3	3	3	0	1	2	4
Tenericutes	1989	50	122	132	136	0	0	80	86	0	0	67	176
Thermodesulfobacteria	21	2	2	2	2	0	0	0	0	0	0	0	2
Thermotogae	123	4	20	20	20	12	12	13	13	0	9	17	20
Verrucomicrobia	400	2	3	5	7	1	1	2	2	0	2	4	5
Archaeal phyla:
Crenarchaeota	315	0	0	2	29	0	1	37	37	0	0	1	1
Euryarchaeota	2706	0	0	0	60	0	2	84	107	0	0	0	0
Korarchaeota	2	0	0	0	0	0	0	1	1	0	0	0	0
Nanoarchaeota	1	0	0	0	0	0	0	0	0	0	0	0	0
Thaumarchaeota	11	0	0	0	0	0	0	0	3	0	0	0	0
Total (% of total species)	241918	0.634513	0.760175	0.785803	0.839954	0.415843	0.628312	0.847808	0.877157	0.00372027	0.160385	0.469994	0.674609
* species without phylum annotation
