# Supplementary material for: Influence of Commonly Used Primer Systems on Automated Ribosomal Intergenic Spacer Analysis of Bacterial Communities in Environmental Samples
Source: PLoS One. 2015 Mar 6;10(3):e0118967. doi: 10.1371/journal.pone.0118967 (PMC4351999; doi:10.1371/journal.pone.0118967)
Supplement: S4 Table — Table shows the potential ability of primer sets to amplify mitochondrial, chloroplast, fungal, plant and invertebrate sequences. (XLSX) [file pone.0118967.s004.xlsx]

## Sheet: Sheet1
Table S4. Non-target species amplifiable by the different primer sets. Table shows the potential ability of primer sets to amplify mitochondrial, chloroplast, fungal, plant and invertebrate sequences.
The in-cell bar illustrates the relative contribution of the taxonomic groups in the used database.
	No. of species	1406f/23Sr				ITSF/ITSReub				S-D-Bact-1522-b-S-20/L-D-Bact-132-a-A-18
		0 mismatch	1 mismatches	2 mismatches	3 mismatches	0 mismatch	1 mismatches	2 mismatches	3 mismatches	0 mismatch	1 mismatches	2 mismatches	3 mismatches
ncbi-mito (mitochondrial database from Metazoa), 3943 sequences
Acanthocephala	6	0	0	0	0	0	0	0	0	0	0	0	0
Annelida	15	0	0	0	0	0	0	0	0	0	0	0	0
Arthropoda	695	0	0	0	0	0	0	0	0	0	0	0	0
Brachiopoda	4	0	0	0	0	0	0	0	0	0	0	0	0
Bryozoa	7	0	0	0	0	0	0	0	0	0	0	0	0
Chaetognatha	5	0	0	0	0	0	0	0	0	0	0	0	0
Chordata	2611	0	0	3	13	0	0	0	0	0	0	0	0
Cnidaria	83	0	0	0	0	0	0	0	0	0	0	0	0
Ctenophora	2	0	0	0	0	0	0	0	0	0	0	0	0
Echinodermata	32	0	0	0	0	0	0	0	0	0	0	0	0
Entoprocta	2	0	0	0	0	0	0	0	0	0	0	0	0
Hemichordata	4	0	0	0	0	0	0	0	0	0	0	0	0
Mollusca	169	0	0	0	0	0	0	0	0	0	0	0	0
Nematoda	80	0	0	0	0	0	0	0	0	0	0	0	0
Nemertea	9	0	0	0	0	0	0	0	0	0	0	0	0
Onychophora	4	0	0	0	0	0	0	0	0	0	0	0	0
Placozoa	5	0	0	0	0	0	0	0	0	0	0	0	0
Platyhelminthes	57	0	0	0	0	0	0	0	0	0	0	0	0
Porifera	49	0	0	0	0	0	0	0	0	0	0	0	0
Priapulida	2	0	0	0	0	0	0	0	0	0	0	0	0
Rotifera	3	0	0	0	0	0	0	0	0	0	0	0	0
Tardigrada	2	0	0	0	0	0	0	0	0	0	0	0	0
Xenacoelomorpha	1	0	0	0	0	0	0	0	0	0	0	0	0
Xenoturbellida	1	0	0	0	0	0	0	0	0	0	0	0	0
Total (% of total species)	3848	0	0	0.0779626	0.337838	0	0	0	0	0	0	0	0
ncbi-chloro (chloroplast database), 498 sequences
Apicomplexa	7	0	0	0	0	0	0	0	0	0	0	0	0
Bacillariophyta	6	0	0	1	5	0	0	0	0	0	0	0	0
Chlorophyta	27	2	5	19	19	0	0	6	10	0	0	0	1
Chromerida	2	1	1	1	1	0	0	1	1	0	0	0	0
Euglenida	5	0	2	3	4	0	0	0	0	0	0	0	0
Eustigmatophyceae	6	0	0	6	6	0	0	0	0	0	0	0	0
None*	25	1	1	15	18	0	3	9	11	0	0	0	0
Phaeophyceae	3	0	0	0	3	0	0	0	0	0	0	0	0
Streptophyta	406	0	0	11	12	0	0	14	15	0	0	0	0
Xanthophyceae	1	0	0	1	1	0	0	0	0	0	0	0	0
Total (% of total species)	488	0.819672	1.84426	11.6803	14.1393	0	0.614754	6.14754	7.58197	0	0	0	0.204918
embl-fun (fungal database), 1287591 sequences
Ascomycota	50855	0	0	1	18	0	0	1	7	0	0	0	0
Basidiomycota	23108	0	0	0	2	0	0	0	11	0	0	0	0
Blastocladiomycota	43	0	0	0	0	0	0	0	0	0	0	0	0
Chytridiomycota	409	0	0	0	0	0	0	0	0	0	0	0	0
Cryptomycota	3	0	0	0	0	0	0	0	0	0	0	0	0
Entomophthoromycota	102	0	0	0	0	0	0	0	0	0	0	0	0
Glomeromycota	1100	0	0	0	0	0	0	0	0	0	0	0	0
Microsporidia	818	0	0	1	3	0	0	0	0	0	0	0	0
Monoblepharidomycota	30	0	0	0	0	0	0	0	0	0	0	0	0
Neocallimastigomycota	305	0	0	0	0	0	0	0	0	0	0	0	0
None*	9442	0	0	0	0	0	0	0	9	0	0	0	0
Total (% of total species)	86215	0	0	0.00231978	0.0266775	0	0	0.00115989	0.0313171	0	0	0	0
embl-pln (plant database), 18132367 sequences
Aurearenophyceae	2	0	0	0	0	0	0	0	0	0	0	0	0
Bacillariophyta	1334	0	0	1	5	0	0	2	24	0	0	0	0
Bolidophyceae	7	0	0	0	0	0	0	0	0	0	0	0	0
Chlorophyta	4945	7	16	52	62	0	0	21	37	0	0	0	4
Eustigmatophyceae	135	0	0	6	6	0	0	0	0	0	0	0	0
None*	10511	1	1	27	41	0	4	90	116	0	0	0	0
Phaeophyceae	1076	0	0	0	4	0	0	0	12	0	0	0	0
Pinguiophyceae	7	0	0	0	0	0	0	0	0	0	0	0	0
Streptophyta	115186	1	2	13	55	3	8	53	172	0	0	4	5
Xanthophyceae	148	0	0	1	1	0	0	1	1	0	0	0	0
Total (% of total species)	133351	0.00674911	0.0142481	0.0749901	0.130483	0.0022497	0.00899881	0.125233	0.271464	0	0	0.0029996	0.00674911
embl-inv (invertebrate database), 3913563 sequences
Acanthocephala	130	0	0	0	0	0	0	0	0	0	0	0	0
Annelida	3675	0	0	0	0	0	0	3	69	0	0	0	0
Apicomplexa	4536	0	0	0	2	0	0	14	16	0	0	0	0
Arthropoda	132792	0	0	0	12	0	0	289	690	0	0	0	0
Brachiopoda	213	0	0	0	0	0	0	0	1	0	0	0	0
Bryozoa	351	0	0	0	1	0	0	0	13	0	0	0	0
Chaetognatha	52	0	0	0	0	0	0	1	1	0	0	0	0
Chordata	350	0	0	0	0	0	0	0	8	0	0	0	0
Chromerida	2	1	1	1	1	0	0	1	1	0	0	0	0
Cnidaria	4670	0	0	0	0	0	0	354	390	0	0	0	0
Ctenophora	53	0	0	0	0	0	0	25	25	0	0	0	0
Cycliophora	7	0	0	0	0	0	0	0	0	0	0	0	0
Echinodermata	1339	0	0	1	1	0	1	1	4	0	0	0	0
Entoprocta	24	0	0	0	0	0	0	0	0	0	0	0	0
Euglenida	265	0	2	3	6	0	0	0	0	0	0	0	0
Gastrotricha	175	0	0	0	0	0	0	0	0	0	0	0	0
Gnathostomulida	26	0	0	0	0	0	0	0	0	0	0	0	0
Haplosporidia	49	0	0	0	0	0	0	0	0	0	0	0	0
Hemichordata	48	0	0	0	0	0	0	0	0	0	0	0	0
Kinorhyncha	49	0	0	0	0	0	0	0	0	0	0	0	0
Loricifera	2	0	0	0	0	0	0	0	0	0	0	0	0
Mollusca	13006	0	0	0	0	0	0	7	209	0	0	0	0
Myzostomida	46	0	0	0	0	0	0	0	0	0	0	0	0
Nematoda	5337	0	0	0	5	0	0	33	258	0	0	0	0
Nematomorpha	42	0	0	0	0	0	0	0	0	0	0	0	0
Nemertea	333	0	0	0	0	0	0	0	0	0	0	0	0
None*	6874	0	0	2	12	0	1	15	38	0	0	0	0
Onychophora	128	0	0	0	0	0	0	0	0	0	0	0	0
Orthonectida	1	0	0	0	0	0	0	0	0	0	0	0	0
Picozoa	5	0	0	0	0	0	0	0	0	0	0	0	0
Placozoa	95	0	0	0	0	0	0	0	0	0	0	0	0
Platyhelminthes	4313	0	0	0	1	0	0	4	275	0	0	0	0
Porifera	1943	0	0	0	0	0	0	31	153	0	0	0	0
Priapulida	8	0	0	0	0	0	0	0	0	0	0	0	0
Rhombozoa	10	0	0	0	0	0	0	0	0	0	0	0	0
Rotifera	350	0	0	0	0	0	0	11	12	0	0	0	0
Tardigrada	419	0	0	0	0	0	0	0	0	0	0	0	0
Xenacoelomorpha	185	0	0	0	0	0	0	0	0	0	0	0	0
Xenoturbellida	2	0	0	0	0	0	0	0	0	0	0	0	0
Total (% of total species)	181905	0.000549738	0.00164921	0.00384816	0.0225392	0	0.00109948	0.433743	1.18908	0	0	0	0
* species without higher taxon annotation
