# Supplementary material for: Influence of Commonly Used Primer Systems on Automated Ribosomal Intergenic Spacer Analysis of Bacterial Communities in Environmental Samples
Source: PLoS One. 2015 Mar 6;10(3):e0118967. doi: 10.1371/journal.pone.0118967 (PMC4351999; doi:10.1371/journal.pone.0118967)
Supplement: S5 Table — (XLSX) [file pone.0118967.s005.xlsx]

## Sheet: Table S5_phyla Genomatix
Table S5. Number of amplifiable sequences from different bacterial, archaeal, plant and invertebrate phyla and genera revealed by Genomatix software suite.
	1406f/23Sr		ITSF/ITSReub
	No. of sequences	No. of genera	No. of sequences	No. of genera
Bacteria:
Acidobacteria	3	2	2	1
Actinobacteria	150	20	161	22
Aquificae	1	1	1	1
Bacteroidetes	41	7	30	3
Chlamydiae	7	4	7	4
Chlorobi	7	1	6	1
Chloroflexi	4	2	-	-
Cyanobacteria	62	10	22	3
Deferribacteres	2	1	2	1
Deinococcus-Thermus	1	1	-	-
Firmicutes	590	28	648	29
Gemmatimonades	1	1	-	-
Planctomycetes	1	1	-	-
Proteobacteria*:
α-Proteobacteria	203	36	207	32
β-Proteobacteria	139	20	145	21
γ-Proteobacteria	692	47	692	41
δ-Proteobacteria	41	9	34	7
ε-Proteobacteria	13	4	20	3
Spirochaetes	1	1	2	1
Tenericutes	5	1	3	1
Thermotogae	6	2	2	1
Plants/Algae:
Chlorophyta	18	12	-	-
Cercozoa (Rhizaria)	3	1	3	1
Streptophyta	-	-	7	3
Rhodophyta	-	-	2	2
Others:
Annelida (Metazoa)	-	-	-	-
Euryarchaeota (Archaea)	-	-	2	1
* Due to the large numbers of genera within the Proteobacteria, this phylum was subdivided into its respective classes.
