# Supplementary material for: Influence of Commonly Used Primer Systems on Automated Ribosomal Intergenic Spacer Analysis of Bacterial Communities in Environmental Samples
Source: PLoS One. 2015 Mar 6;10(3):e0118967. doi: 10.1371/journal.pone.0118967 (PMC4351999; doi:10.1371/journal.pone.0118967)
Supplement: S8 Table — (XLS) [file pone.0118967.s008.xls]

## Sheet: Table S8-B-ARISA soil_plant
Table S8. B-ARISA analyses in soil and wood samples for 1406f/23Sr and ITSF/ITSReub primer sets.
Environmental sample	1406f/23Sr			ITSF/ITSReub
	Number of OTUs ± SD	Range of OTU size (bp)	Shannon diversity (mean± SD)	Number of OTUs ± SD	Range of OTU size (bp)	Shannon diversity (mean± SD)
Natural soil (unfertilized soil)	41.00±9.06 a	385 - 1093	3.47±0.23 a	70.20±17.09 a	229 - 1297	3.90±0.23 a
Fertilized soil	39.80±11.28 a	383 - 1053	3.40±0.28 a	59.80±22.64 a	221 - 1301	3.70±0.51 a
Norway Spruce wood	48.20±15.34 a	478 - 1236	3.55±0.36 a	65.40±29.62 a	270 - 1300	3.65±0.64 a
European Beech wood	64.40±19.44 a	446 - 1346	3.58±0.47 a	69.80±29.84 a	234 - 1298	3.42±0.76 a
***Different letters represent statistically significant differences (P < 0.05) after the paired t-test . Jarque-Bera JB test was used to test for normality in all datasets.
